# Supplementary material for: Swelling-processed high luminescent organic perovskite with superior stability
Source: Royal Society of Chemistry journal article supplement (doi:10.1039/d1tc02650j), 2021-01-01
Supplement: d1tc02650j1.pdf [file d1tc02650j1.pdf]

Supplementary information for:

## Swelling-processed High Luminescent Organic Perovskite with Superior Stability

Tianhao Wang<sup>a#</sup>, Ruofeng Song<sup>a#</sup>, Yujie Lv<sup>b#</sup>, Dawei Gu<sup>a</sup>, Ying Yang<sup>a</sup>, Wei Liu<sup>c\*</sup>, Feng Chen<sup>a\*</sup>

a. School of Physical and Mathematical Sciences, Nanjing Tech University, Nanjing 211800, P. R. China

b. State Key Laboratory of Bioelectronics, School of Physics, Southeast University, Nanjing 210096, P. R. China

c. College of Optical, Mechanical and Electrical Engineering, Zhejiang A&F University, Hangzhou 311300, China

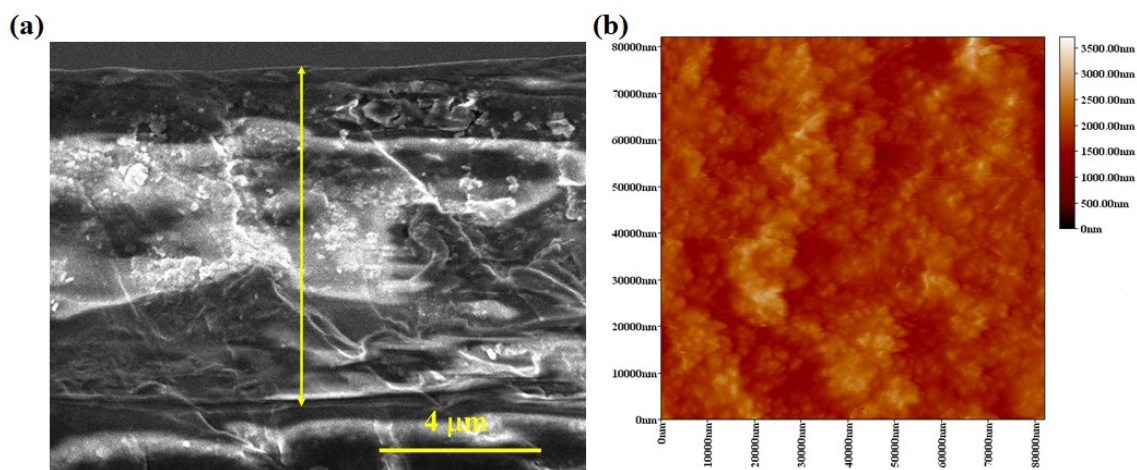

Fig. S1. (a) the SEM image of PVF/PVDF-CH<sub>3</sub>NH<sub>3</sub>PbBr<sub>3</sub> nanocrystals film cross section profile, (b) the AFM image of PVF/PVDF-CH<sub>3</sub>NH<sub>3</sub>PbBr<sub>3</sub> film surface.

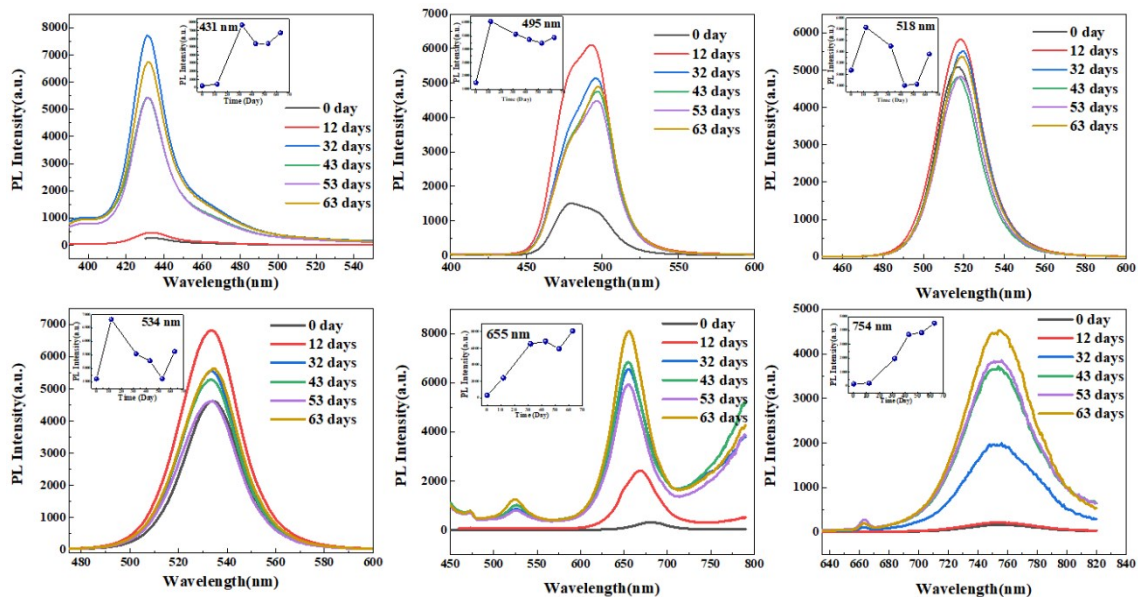

Fig. S2. PL intensity evolution of  $\text{CH}_3\text{NH}_3\text{PbBr}_n\text{I}_{3-n}$  and  $\text{CH}_3\text{NH}_3\text{PbCl}_n\text{I}_{3-n}$  film nanocrystals film in the air at room temperature for more than 63 days.

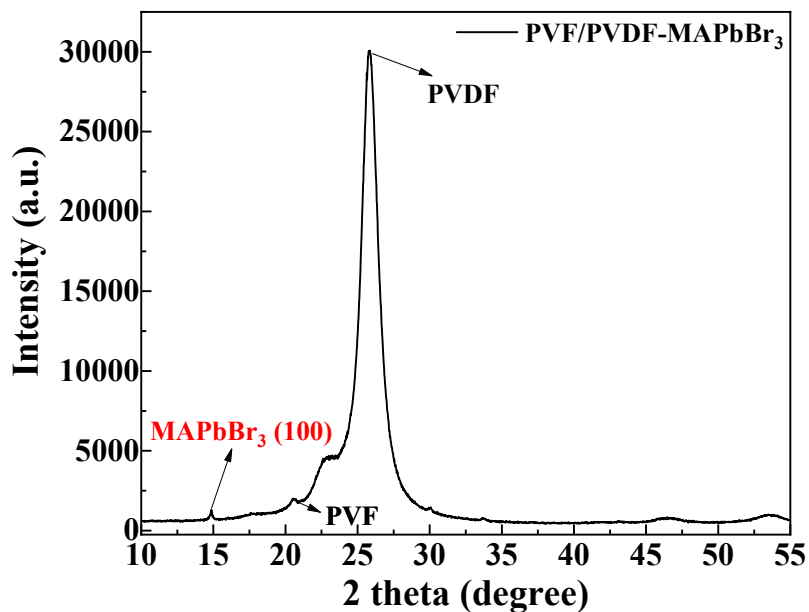

Fig. S3. XRD patterns of PVF/PVDF-MAPbBr<sub>3</sub> film.

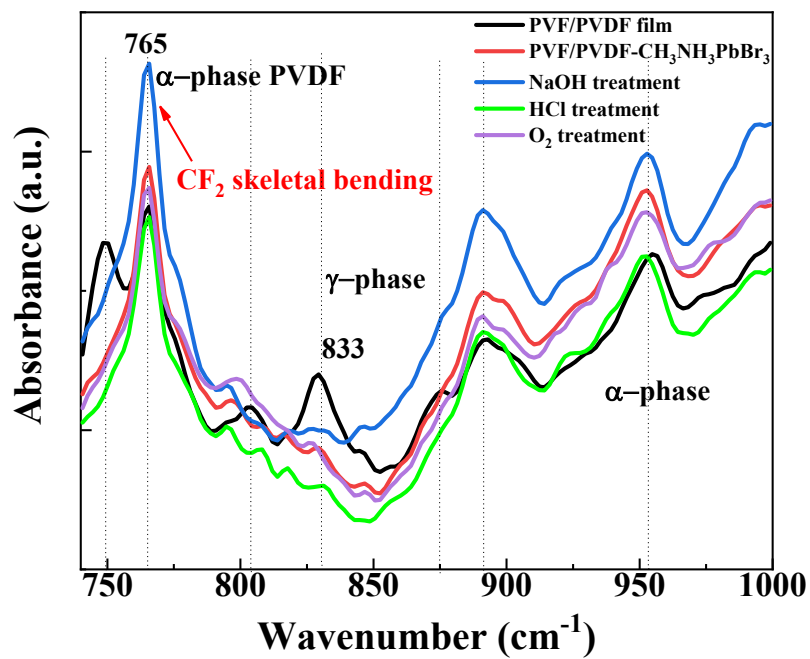

Fig. S4. FTIR spectra of PVF/PVDF film, PVF/PVDF-MAPbBr<sub>3</sub> film before and after NaOH, HCl, O<sub>2</sub> plasma treatment.
